# Supplementary figures and images for: Metabolome-Proteome Differentiation Coupled to Microbial Divergence
Source: PubMed Central journal article supplement — mBio. 2010 Oct 26;1(5):e00246-10. doi: 10.1128/mBio.00246-10 (PMC2962434; doi:10.1128/mbio.00246-10), 2010-10-26

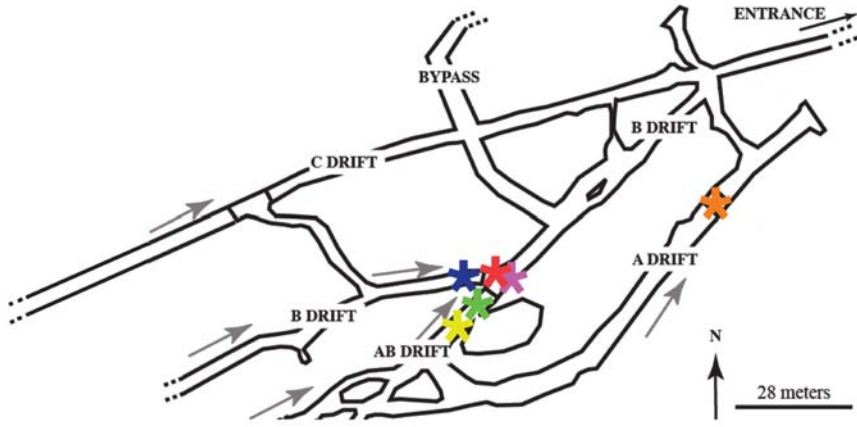

Supplement: mBio00246-10-sf01.pdf [file mBio00246-10-sf01.pdf]

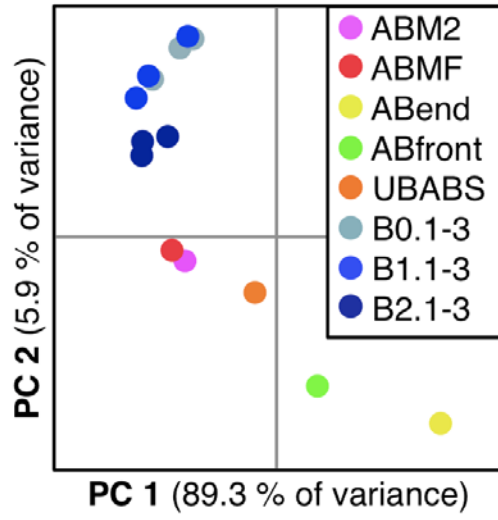

Supplement: mBio00246-10-sf02.pdf [file mBio00246-10-sf02.pdf]

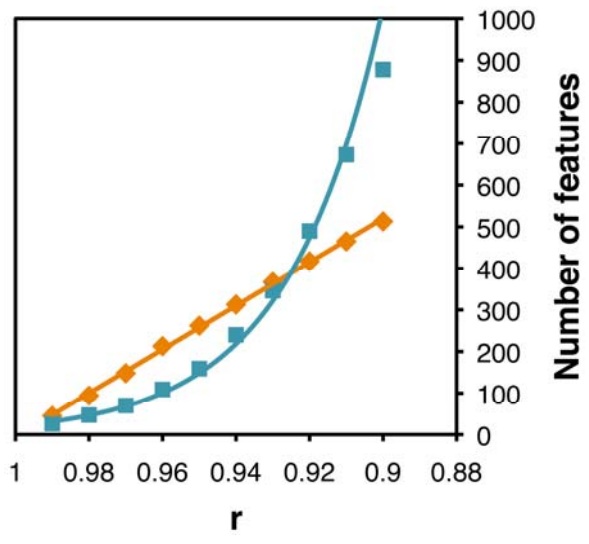

Supplement: mBio00246-10-sf03.pdf [file mBio00246-10-sf03.pdf]
